# Supplementary material for: Stabilization of copper nanoparticles onto the double Schiff-base-functionalized ZSM-5 for A3 coupling reaction catalysis aimed under mild conditions
Source: Royal Society of Chemistry journal article supplement (doi:10.1039/d2ra07700k), 2023-01-01
Supplement: d2ra07700k1.pdf [file d2ra07700k1.pdf]

## Electronic Supporting information

### Stabilization of copper nanoparticles onto the double Schiff-base-functionalized ZSM-5 for A<sup>3</sup> coupling reaction catalysis aiming under mild conditions

Leila Mohammadi<sup>a</sup>, Mojtaba Hosseinifard<sup>b\*</sup>, Mohammad Reza Vaezi<sup>a\*</sup>, Sadegh Rostamnia<sup>c</sup>

<sup>a</sup>*Department of Nano Technology and Advanced Materials, Materials and Energy Research Center, Karaj, Iran. E-mail: [L.mohammadi3790@gmail.com](mailto:L.mohammadi3790@gmail.com), [m\\_r\\_vaezi@merc.ac.ir](mailto:m_r_vaezi@merc.ac.ir)*

<sup>b</sup>*Department of Energy, Materials and Energy Research Center, Karaj, Iran. E-mail: [m.hosseini@merc.ac.ir](mailto:m.hosseini@merc.ac.ir)*

<sup>c</sup>*Organic and Nano Group (ONG), Department of Chemistry, Iran University of Science and Technology (IUST), PO BOX 16846-13114, Tehran, Iran. E-mail: [rostamnia@iust.ac.ir](mailto:rostamnia@iust.ac.ir)*

**Table S1.** investigation of the effects on catalyst efficiency

| Entrance | Product                                                                             | Time (min) | ZSM-5@Cu Yield (%) | ZSM-5@ATPS@Cu Yield (%) | ZSM-5@ATPS@2-aminopyridine/terephthalaldehyde@Cu Final Catalyst Yield (%) |
|----------|-------------------------------------------------------------------------------------|------------|--------------------|-------------------------|---------------------------------------------------------------------------|
| 1        | 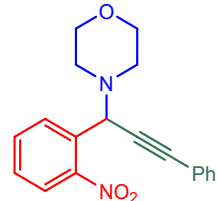   | 120        | 85                 | 88                      | 99                                                                        |
| 2        |    | 120        | 82                 | 85                      | 98                                                                        |
| 3        |   | 120        | 76                 | 79                      | 91                                                                        |
| 4        |  | 120        | 75                 | 77                      | 90                                                                        |
| 5        |  | 120        | 77                 | 80                      | 93                                                                        |
| 6        |  | 120        | 81                 | 83                      | 95                                                                        |

|    |                                                                                     |     |    |    |    |
|----|-------------------------------------------------------------------------------------|-----|----|----|----|
| 7  | 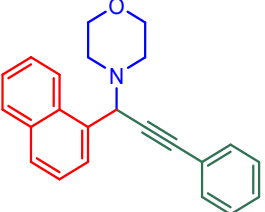   | 120 | 80 | 81 | 92 |
| 8  |    | 120 | 78 | 79 | 91 |
| 9  |    | 120 | 78 | 79 | 92 |
| 10 |   | 120 | 80 | 81 | 94 |
| 11 |  | 120 | 78 | 79 | 90 |
| 12 |  | 120 | 84 | 85 | 95 |
| 13 |  | 120 | 75 | 76 | 93 |

|    |                                                                                     |     |    |    |    |
|----|-------------------------------------------------------------------------------------|-----|----|----|----|
| 14 | 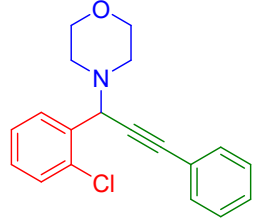   | 120 | 76 | 77 | 92 |
| 15 |    | 120 | 79 | 79 | 94 |
| 16 |    | 120 | 79 | 79 | 93 |
| 17 |   | 120 | 83 | 84 | 95 |
| 18 |  | 120 | 84 | 85 | 96 |
| 19 |  | 120 | 85 | 85 | 97 |
| 20 |  | 120 | 67 | 68 | 85 |

Reaction conditions: 1 mmol of morpholine, 1 mmol of benzaldehyde, and 1.1 mmol of phenylacetylene.

### 1-(1-(2-nitrophenyl)-3-phenylprop-2-ynyl) morpholine

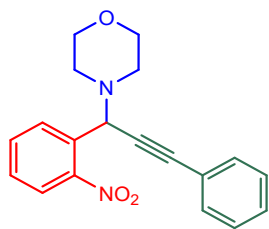

$^1\text{H NMR}$  (400 MHz,  $\text{CDCl}_3$ ):  $\delta$  2.43 (s, 2H), 2.62 (s, 2H), 3.63 (s, 4H), 5.65 (s, 1H), 7.26-7.56 (m, 7H), 7.71 (d,  $J = 7.5$  Hz, 1H), 7.95 (d,  $J = 7.2$  Hz, 1H).  $^{13}\text{C NMR}$  (100 MHz,  $\text{CDCl}_3$ ):  $\delta$  49, 57.3, 66.3, 81.4, 90.1, 121.9, 123.8, 127.9, 128.1, 128.3, 129.6, 130.9, 131.3, 131.6, 149.4.

### 2-(1,3-diphenylprop-2-yn-1-yl) piperidine

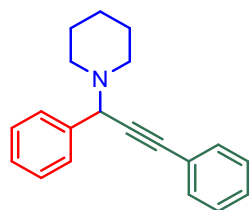

$^1\text{H NMR}$  ( $\text{CDCl}_3$ , 400 MHz):  $\delta$  7.70-7.64 (m, 2H), 7.58-7.53 (m, 2H), 7.43-7.34 (m, 6H), 4.91 (s, 1H), 2.65 (t, 4H), 1.73-1.59 (m, 4H), 1.50-1.48 (m, 2H).  $^{13}\text{C NMR}$  ( $\text{CDCl}_3$ , 100 MHz):  $\delta$  138.00, 131.85, 128.74, 128.33, 128.19, 128.15, 127.68, 123.20, 88.08, 85.69, 62.33, 50.63, 25.94, 24.31.

### 3-(3-phenyl-1-(p-tolyl) prop-2-yn-1-yl) piperidine

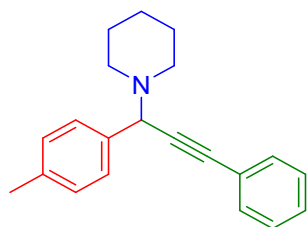

$^1\text{H NMR}$  ( $\text{CDCl}_3$ , 400 MHz):  $\delta$  7.59-7.54 (m, 4H), 7.39-7.35 (m, 3H), 7.22 (d, 2H,  $J=8$ ), 4.89 (s, 1H), 2.66 (t, 4H), 2.40 (s, 3H), 1.73-1.60 (m, 4H), 1.51-1.49 (m, 2H).  $^{13}\text{C NMR}$  ( $\text{CDCl}_3$ , 100 MHz):  $\delta$  137.40, 134.90, 131.85, 128.87, 128.72, 128.33, 128.16, 123.27, 87.90, 85.96, 62.08, 50.61, 25.92, 24.34, 21.19.

### 4-(1-(4-methoxyphenyl)-3-phenylprop-2-yn-1-yl) piperidine

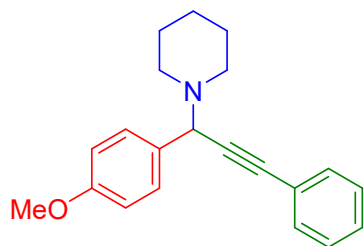

$^1\text{H}$  NMR ( $\text{CDCl}_3$ , 400 MHz):  $\delta$  7.59-7.55 (m, 4H), 7.38-7.36 (m, 3H), 6.94 (d, 2H,  $J=8$ ), 4.80 (s, 1H), 3.86 (s, 3H), 2.60 (br, 4H), 1.67-1.47 (m, 6H).  $^{13}\text{C}$  NMR ( $\text{CDCl}_3$ , 100 MHz):  $\delta$  159.00, 131.83, 130.67, 129.71, 128.31, 128.05, 123.41, 113.41, 87.65, 86.43, 61.80, 55.31, 50.64, 26.20, 24.51.

#### 5-(1,(3-diphenylprop-2-yn-1-yl) pyrrolidine

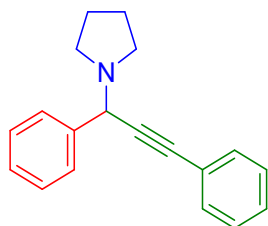

$^1\text{H}$  NMR ( $\text{CDCl}_3$ , 400 MHz):  $\delta$  7.66 (t, 2H), 7.55-7.53 (m, 2H), 7.45-7.34 (m, 6H), 5.06 (s, 1H), 2.85-2.72 (m, 4H), 2.03-1.82 (m, 4H).  $^{13}\text{C}$  NMR ( $\text{CDCl}_3$ , 100 MHz):  $\delta$  138.69, 131.84, 128.51, 128.37, 128.34, 128.03, 127.87, 123.03, 87.29, 86.07, 58.97, 50.19, 23.52.

#### 6-(1-(4-bromophenyl)-3-phenylprop-2-yn-1-yl) piperidine

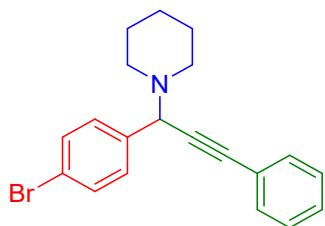

$^1\text{H}$  NMR ( $\text{CDCl}_3$ , 400 MHz):  $\delta$  7.69 (d, 1H,  $J=8$ ), 7.58-7.50 (m, 5H), 7.37 (t, 3H), 4.79 (s, 1H), 2.58 (t, 4H), 1.70-1.57 (m, 4H), 1.50-1.38 (m, 2H).  $^{13}\text{C}$  NMR ( $\text{CDCl}_3$ , 100 MHz):  $\delta$  137.83, 131.85, 131.18, 130.24, 129.06, 128.36, 128.26, 88.30, 85.29, 61.79, 50.67, 26.14, 24.39.

#### 7-(1-(naphthalen-3-yl)-3-phenylprop-2-ynyl) piperidine

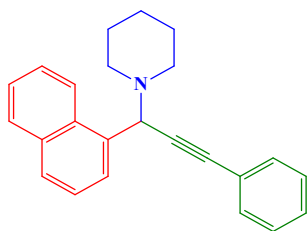

$^1\text{H}$  NMR (400 MHz,  $\text{CDCl}_3$ , ppm):  $\delta$  1.47-1.51 (m, 2H), 1.60-1.67 (m, 4H), 2.64 (t, 4H), 4.97 (s, 1H), 7.36-7.40 (m, 3H), 7.48-7.52 (m, 2H), 7.58-7.61 (m, 2H), 7.79 (dd,  $J^1=J^2=8.4$  Hz, 1H), 7.85-7.91 (m, 3H), 8.11 (s, 1H);  $^{13}\text{C}$  NMR (100 MHz,  $\text{CDCl}_3$ , ppm)  $\delta$  24.4, 26.2, 50.8, 62.5, 86, 88.1, 123.3, 125.8, 125.9, 126.7, 127.2, 127.5, 127.7, 128.1, 128.12, 131.8, 132.9, 133.1, 136.3.

### 8-(3-phenyl-1-(o-tolyl) prop-2-yn-1-yl) morpholine

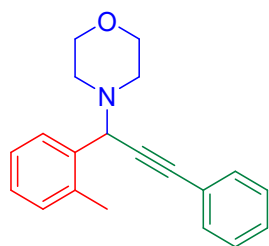

$^1\text{H}$  NMR (400 MHz, Chloroform-*d*)  $\delta$  7.76 – 7.71 (m, 1H), 7.58 – 7.53 (m, 2H), 7.39 – 7.32 (m, 3H), 7.23 (dd,  $J = 5.8, 3.7$  Hz, 3H), 4.91 (s, 1H), 3.77 – 3.64 (m, 4H), 2.66 (t,  $J = 4.7$  Hz, 4H), 2.51 (s, 3H).  $^{13}\text{C}$  NMR (75 MHz, Chloroform-*d*)  $\delta$  137.6, 135.8, 131.8, 130.8, 129.1, 128.4, 128.2, 127.9, 125.4, 123.1, 88.7, 85.1, 67.3, 59.9, 49.8, 19.2.

### 9-(3-phenyl-1-(p-tolyl) prop-2-yn-1-yl) morpholine

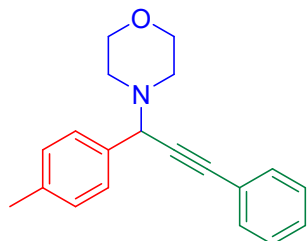

$^1\text{H}$  NMR (400 MHz, Chloroform-*d*)  $\delta$  7.50 (q,  $J = 3.5$  Hz, 4H), 7.31 (t,  $J = 4.6$  Hz, 3H), 7.20 – 7.13 (m, 2H), 4.74 (d,  $J = 3.4$  Hz, 1H), 3.72 (d,  $J = 4.9$  Hz, 4H), 2.62 (t,  $J = 4.6$  Hz, 4H), 2.34 (s, 3H).  $^{13}\text{C}$  NMR (100 MHz, Chloroform-*d*)  $\delta$  137.5, 134.8, 131.8, 129.0, 128.6, 128.3, 128.2, 123.0, 88.3, 85.34, 67.2, 61.8, 49.9, 21.2.

### 10-(3-phenyl-1-(p-tolyl) prop-2-yn-1-yl)piperidine

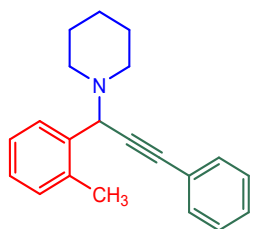

$^1\text{H}$  NMR ( $\text{CDCl}_3$ , 400 MHz):  $\delta$  7.59-7.54 (m, 4H), 7.39-7.35 (m, 3H), 7.22 (d, 2H,  $J=8$ ), 4.89 (s, 1H), 2.66 (t, 4H), 2.40 (s, 3H), 1.73-1.60 (m, 4H), 1.51-1.49 (m, 2H).  $^{13}\text{C}$  NMR ( $\text{CDCl}_3$ , 100 MHz):  $\delta$  137.40, 134.90, 131.85, 128.87, 128.72, 128.33, 128.16, 123.27, 87.90, 85.96, 62.08, 50.61, 25.92, 24.34, 21.19.

### 11-(1-(4-methoxyphenyl)-3-phenylprop-2-yn-1-yl) morpholine

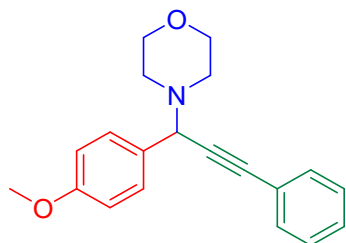

$^1\text{H}$  NMR (300 MHz, Chloroform-*d*)  $\delta$  7.57 (t,  $J = 1.2$  Hz, 1H), 7.54 (ddd,  $J = 6.0, 2.5, 1.6$  Hz, 3H), 7.37 – 7.31 (m, 3H), 6.95 – 6.89 (m, 2H), 4.76 (s, 1H), 3.81 (s, 3H), 3.75 (td,  $J = 5.1, 3.0$  Hz, 4H), 2.64 (dt,  $J = 5.2, 3.3$  Hz, 4H).  $^{13}\text{C}$  NMR (75 MHz, Chloroform-*d*)  $\delta$  159.2, 131.8, 129.8, 129.7, 128.3, 128.2, 123.0, 113.6, 88.3, 85.40, 67.1, 61.4, 55.3, 49.8.

### 12-(3-phenyl-1-(pyrrolidin-1-yl) prop-2-ynyl) phenol

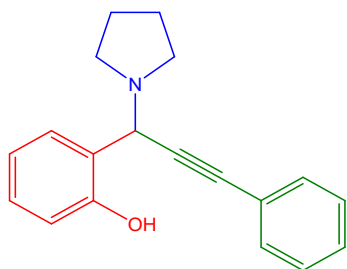

$^1\text{H}$  NMR (400 MHz,  $\text{CDCl}_3$ ):  $\delta$  1.87-1.89 (m, 4H), 2.78-2.88 (m, 4H), 5.29 (s, 1H), 6.82-6.87 (m, 2H), 7.19-7.27 (m, 1H), 7.34-7.37 (m, 3H), 7.51-7.54 (m, 3H).  $^{13}\text{C}$  NMR (100 MHz,  $\text{CDCl}_3$ ):  $\delta$  23.8, 48.9, 57.1, 83, 89, 116.2, 118.9, 122.2, 122.6, 127.8, 128.4, 128.5, 128.8, 129.9, 131.9, 157.6.

### 13-(3-phenyl-1-(thiophen-2-yl) prop-2-yn-1-yl)morpholine



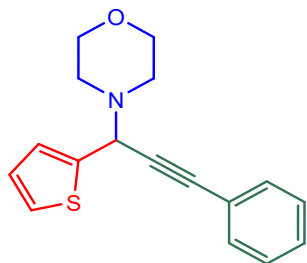

$^1\text{H}$  NMR ( $\text{CDCl}_3$ , 400 MHz):  $\delta$  7.57-7.53 (m, 2H), 7.38-7.28 (m, 5H), 7.02-7.00 (m, 1H), 5.05 (s, 1H), 3.84-3.77 (m, 4H), 2.79-2.68 (m, 4H).  $^{13}\text{C}$  NMR ( $\text{CDCl}_3$ , 100 MHz):  $\delta$  142.66, 131.89, 128.49, 128.38, 126.51, 126.38, 125.89, 122.66, 87.64, 84.25, 67.12, 57.79, 49.64.

#### 14-(1-(2-chlorophenyl)-3-phenylprop-2-yn-1-yl) morpholine

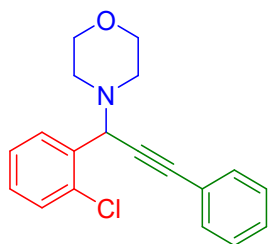

$^1\text{H}$  NMR ( $\text{CDCl}_3$ , 400 MHz):  $\delta$  7.81 (d, 1H,  $J=8$ ), 7.56-7.53 (m, 2H), 7.48-7.42 (m, 1H), 7.39-7.28 (m, 5H), 5.18 (s, 1H), 3.79-3.75 (m, 4H), 2.73 (br, 4H).  $^{13}\text{C}$  NMR ( $\text{CDCl}_3$ , 100 MHz):  $\delta$  135.51, 134.68, 131.86, 130.62, 129.95, 129.22, 128.44, 128.38, 126.42, 122.78, 88.42, 84.65, 67.11, 58.96, 49.85.

#### 15-(3-phenyl-1-(thiophen-3-yl) prop-2-yn-1-yl) piperidine:

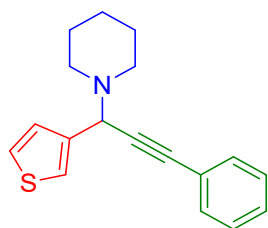

$^1\text{H}$  NMR ( $\text{CDCl}_3$ , 400 MHz):  $\delta$  7.57-7.55 (m, 2H), 7.46 (s, 1H), 7.41-7.29 (m, 5H), 4.88 (s, 1H), 2.62 (br, 4H), 1.83-1.60 (m, 4H), 1.51-1.49 (m, 2H).  $^{13}\text{C}$  NMR ( $\text{CDCl}_3$ , 100 MHz):  $\delta$  140.29, 131.86, 128.34, 128.15, 127.94, 125.39, 123.29, 123.26, 86.68, 86.22, 58.31, 50.62, 26.20, 24.48.

#### 1-(1-(2-nitrophenyl)-3-phenylprop-2-yn-1-yl) morpholine

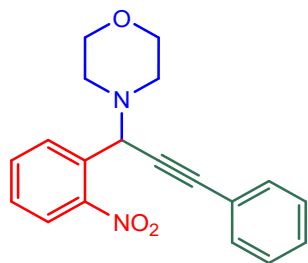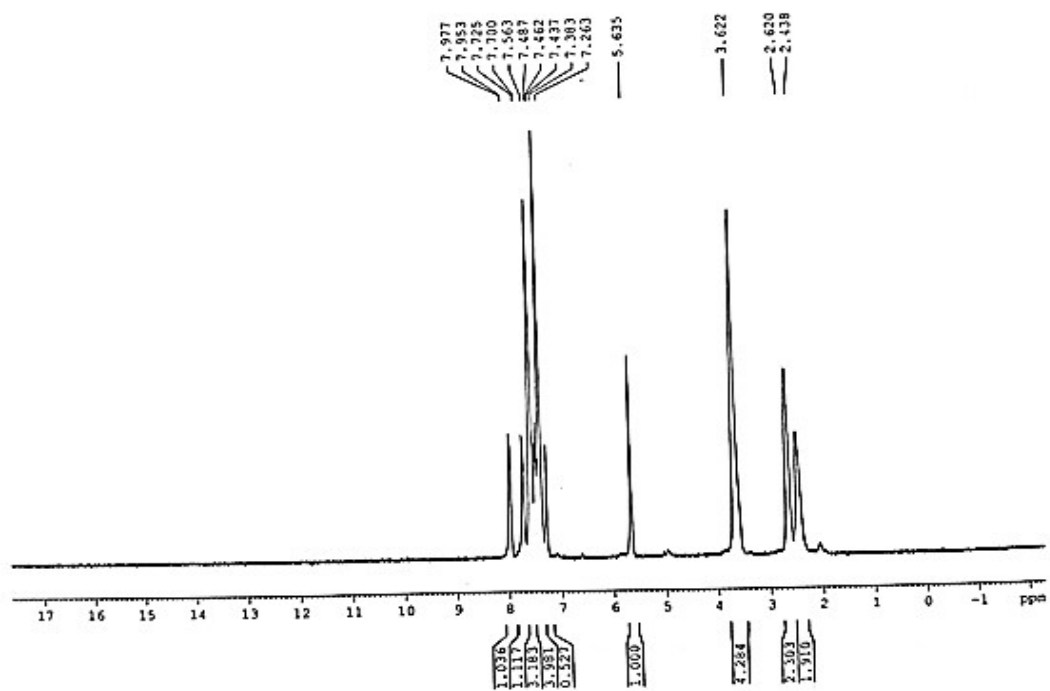

<sup>1</sup>H NMR

4-(1-(2-nitrophenyl)-3-phenylprop-2-yn-1-yl)morpholine

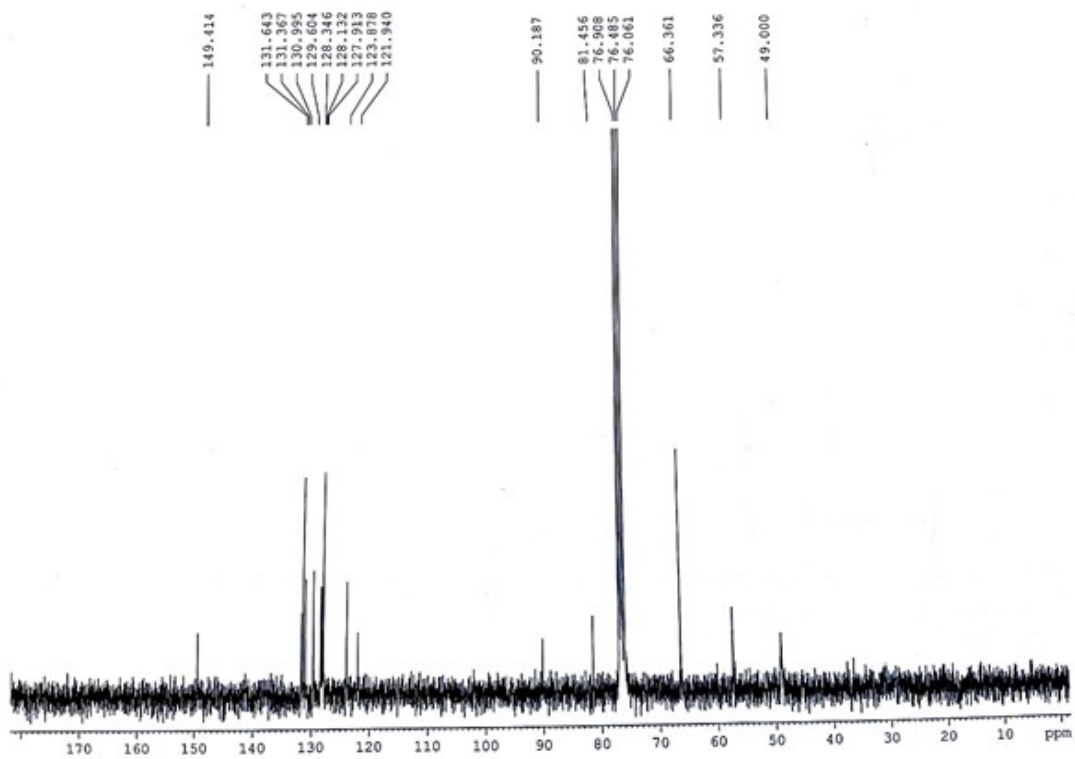

$^{13}\text{C}$ NMR

4-(1-(2-nitrophenyl)-3-phenylprop-2-yn-1-yl) morpholine

## 2-(1,3-diphenylprop-2-yn-1-yl) piperidine

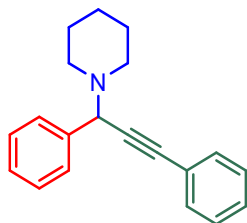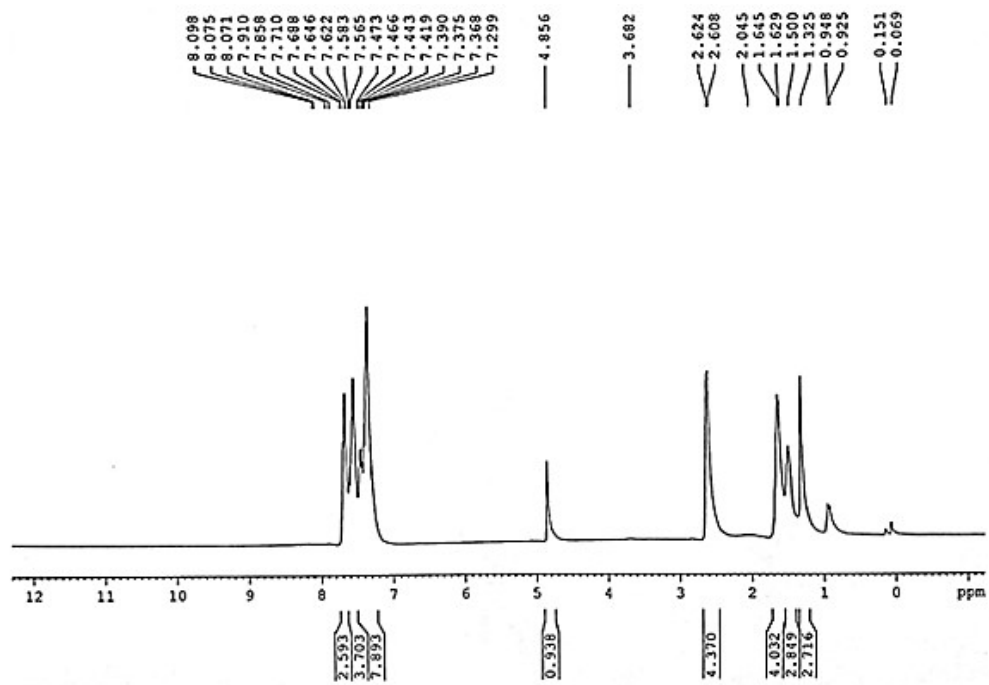

<sup>1</sup>H NMR

1-(1,3-diphenylprop-2-yn-1-yl) piperidine

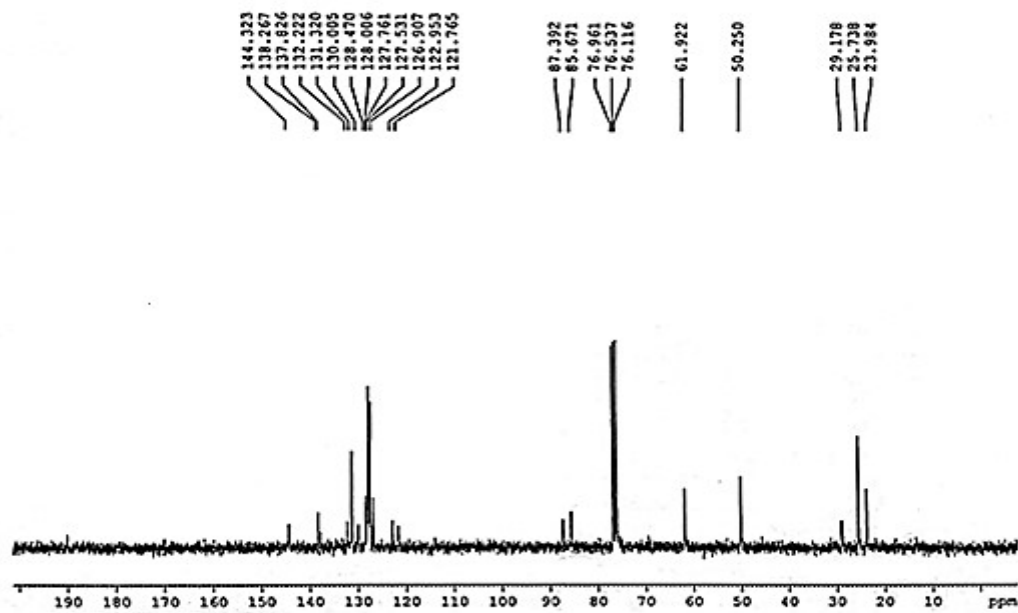

<sup>13</sup>CNMR

1-(1,3-diphenylprop-2-yn-1-yl) piperidine

### 3-(3-phenyl-1-(p-tolyl) prop-2-yn-1-yl)piperidine

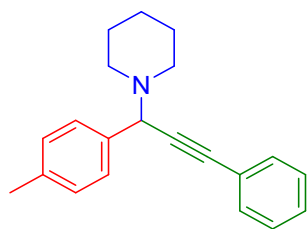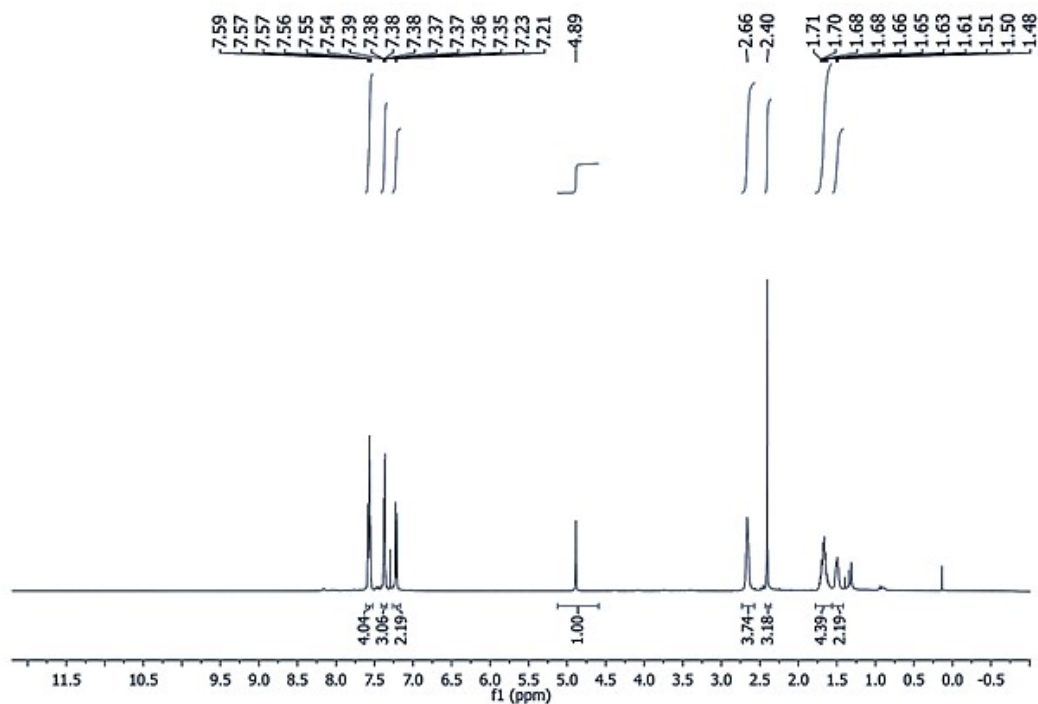

<sup>1</sup>H NMR

1-(3-phenyl-1-(p-tolyl) prop-2-yn-1-yl)piperidine

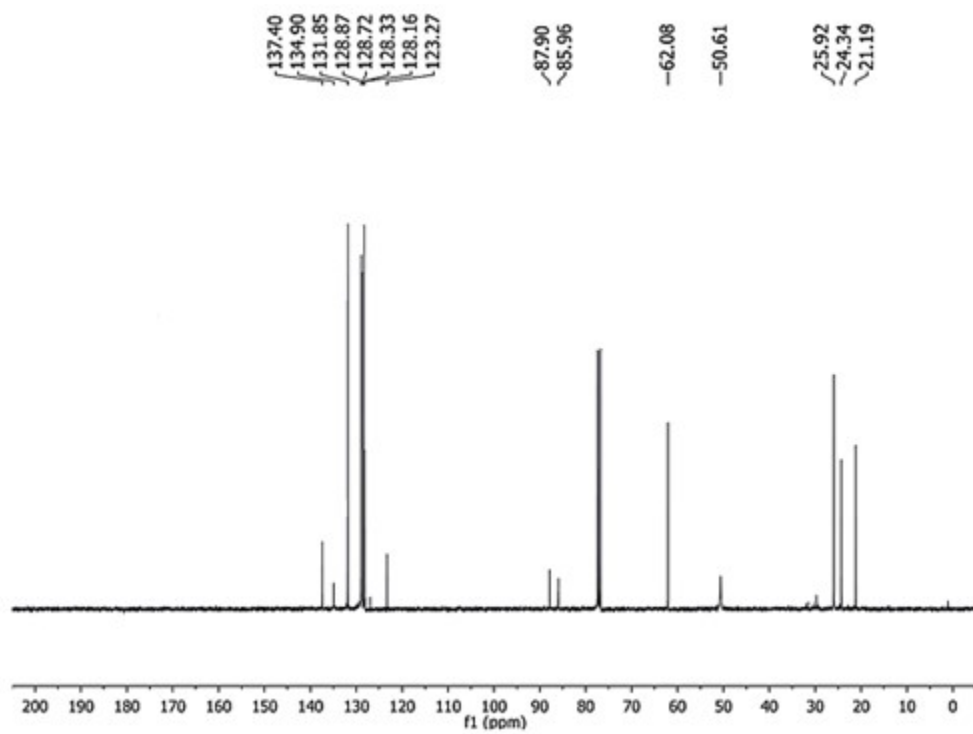

<sup>13</sup>C NMR

1-(3-phenyl-1-(p-tolyl) prop-2-yn-1-yl)piperidine

# 4-(1-(4-methoxyphenyl)-3-phenylprop-2-yn-1-yl) piperidine

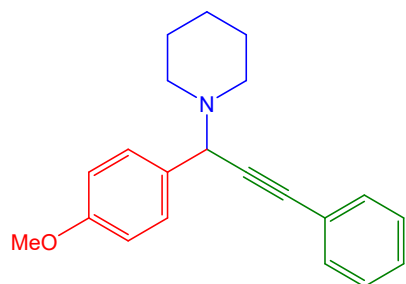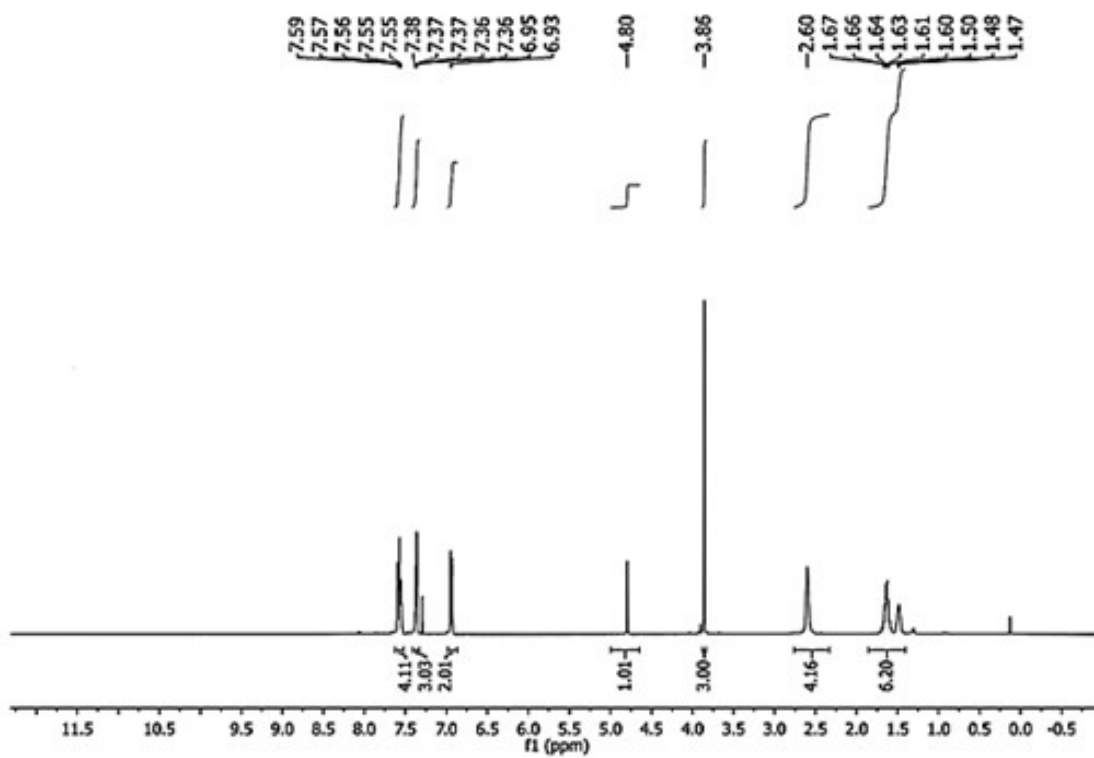

<sup>1</sup>H NMR

1-(1-(4-methoxyphenyl)-3-phenylprop-2-yn-1-yl) piperidine



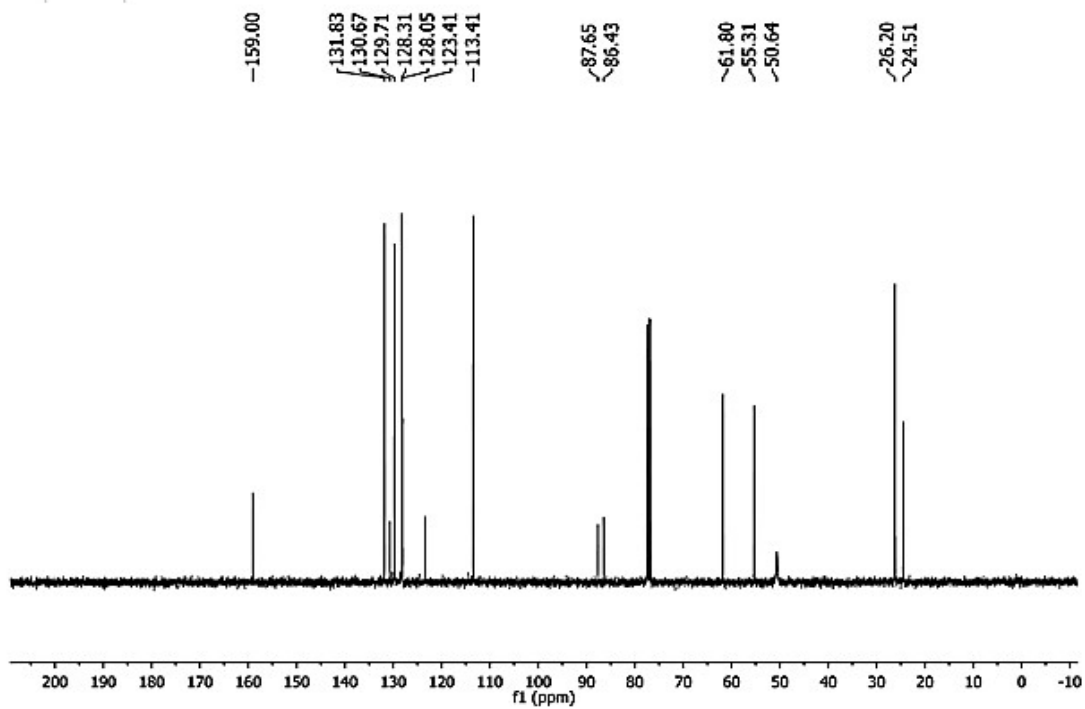

$^{13}\text{C}$ NMR

1-(1-(4-methoxyphenyl)-3-phenylprop-2-yn-1-yl) piperidine

## 5. 1-(1,3-diphenylprop-2-yn-1-yl) pyrrolidine

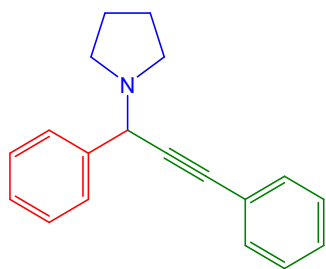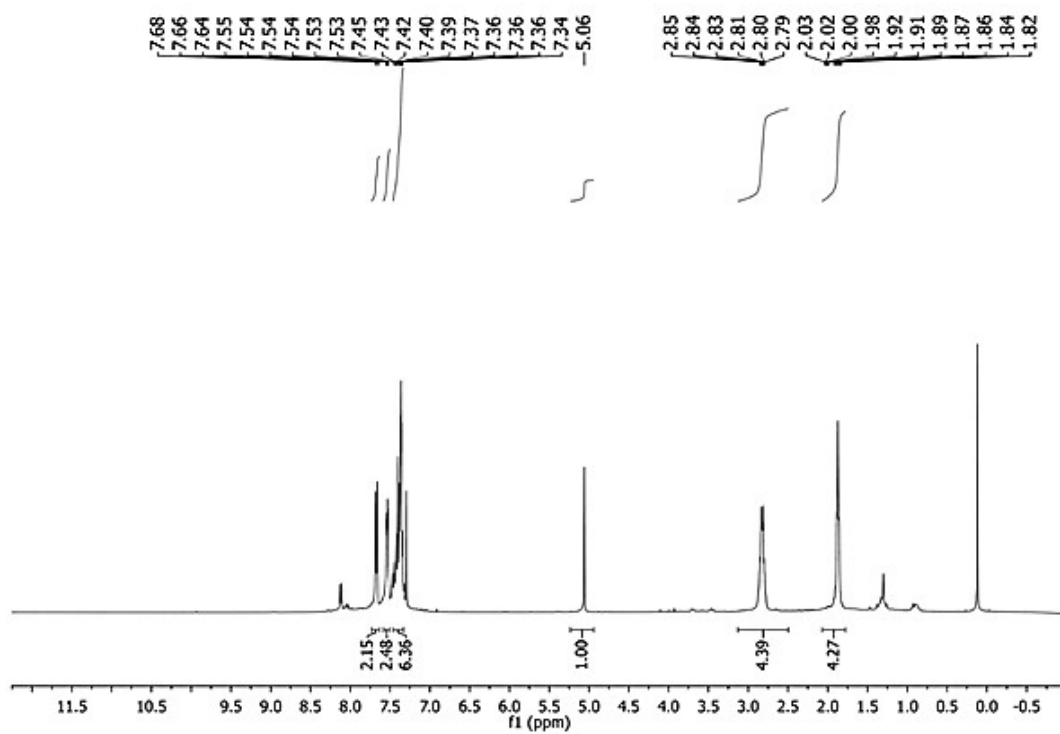

<sup>1</sup>H NMR

1-(1,3-diphenylprop-2-yn-1-yl) pyrrolidine

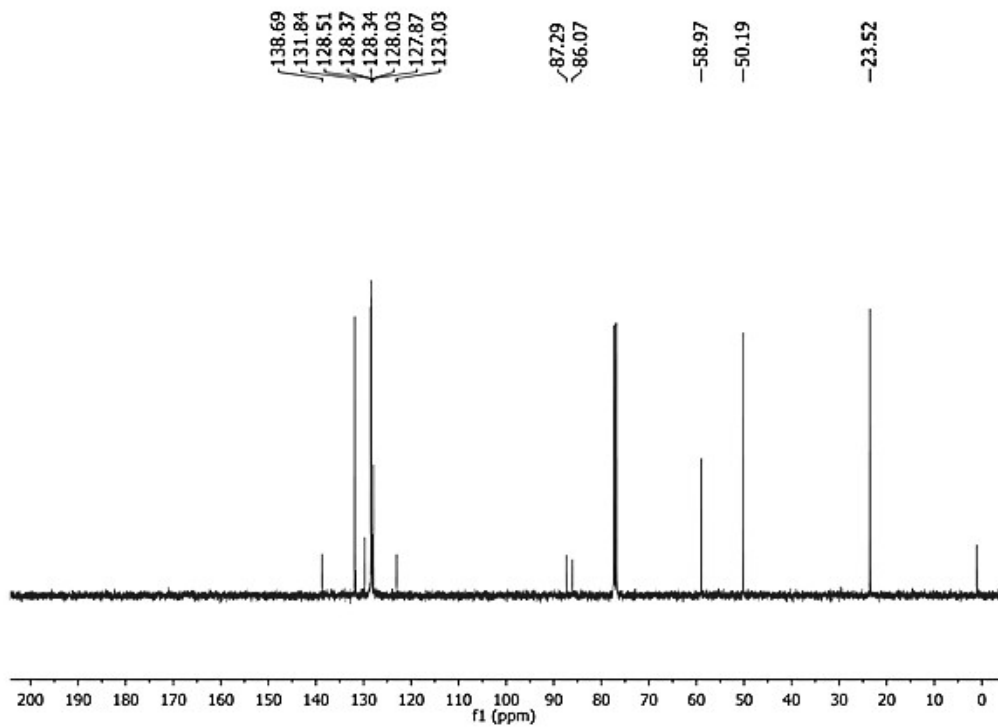

<sup>13</sup>C NMR

1-(1,3-diphenylprop-2-yn-1-yl) pyrrolidine

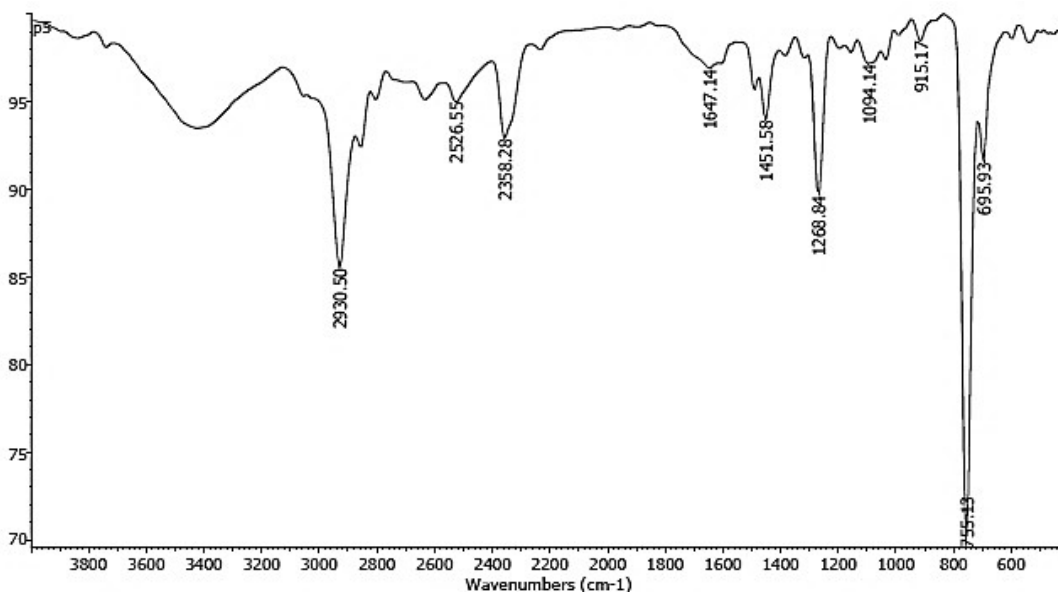

FT-IR

1-(1,3-diphenylprop-2-yn-1-yl) pyrrolidine

# 6-(1-(4-bromophenyl)-3-phenylprop-2-yn-1-yl) piperidine

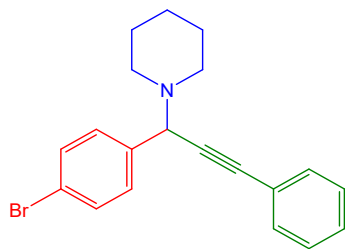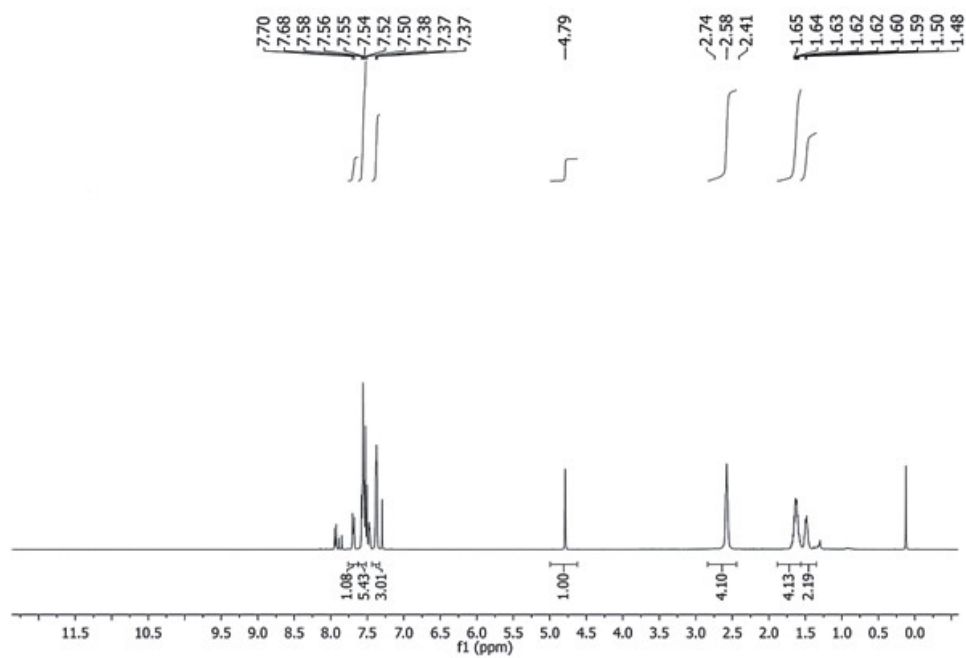

<sup>1</sup>H NMR

1-(1-(4-bromophenyl)-3-phenylprop-2-yn-1-yl) piperidine

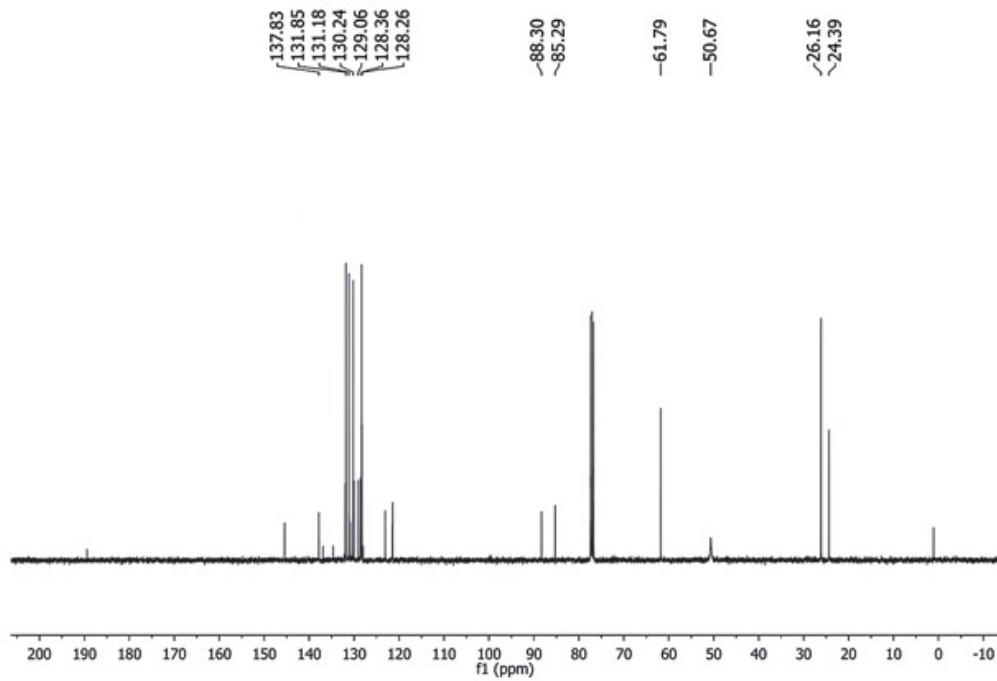

<sup>13</sup>C NMR

1-(1-(4-bromophenyl)-3-phenylprop-2-yn-1-yl) piperidine

7-(1-(naphthalen-1-yl)-3-phenylprop-2-yn-1-yl) piperidine

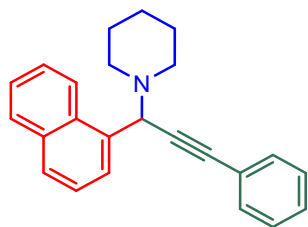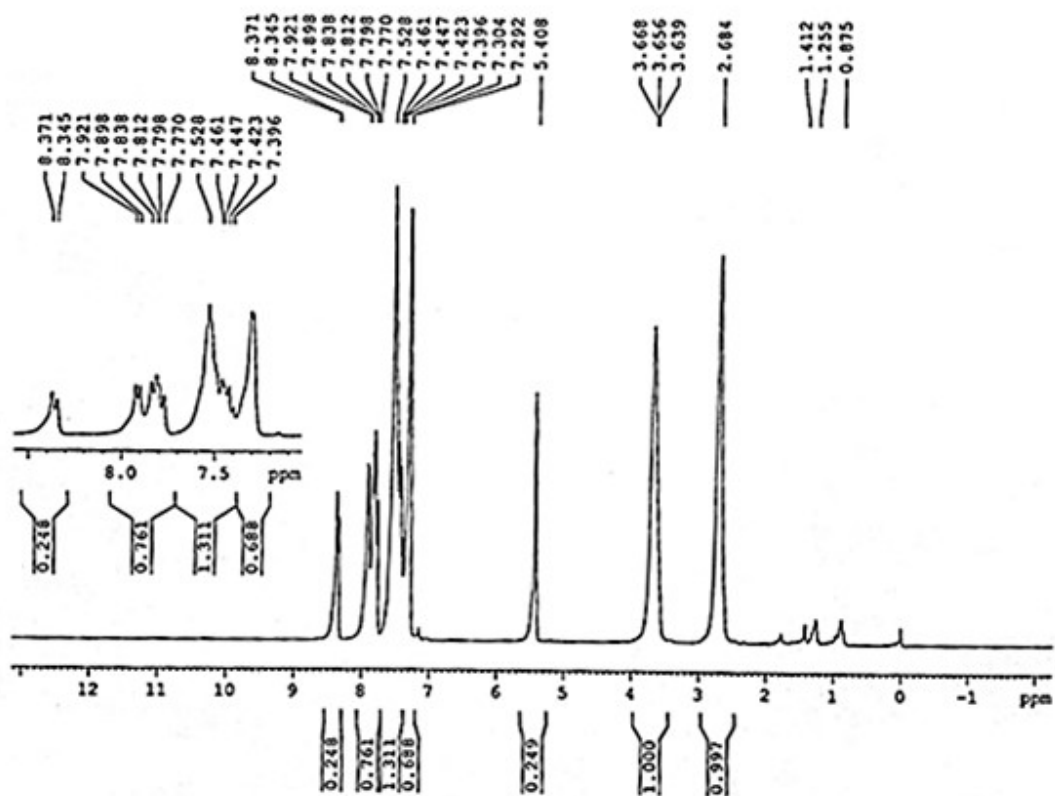

<sup>1</sup>H NMR

1-(1-(naphthalen-1-yl)-3-phenylprop-2-yn-1-yl) piperidine

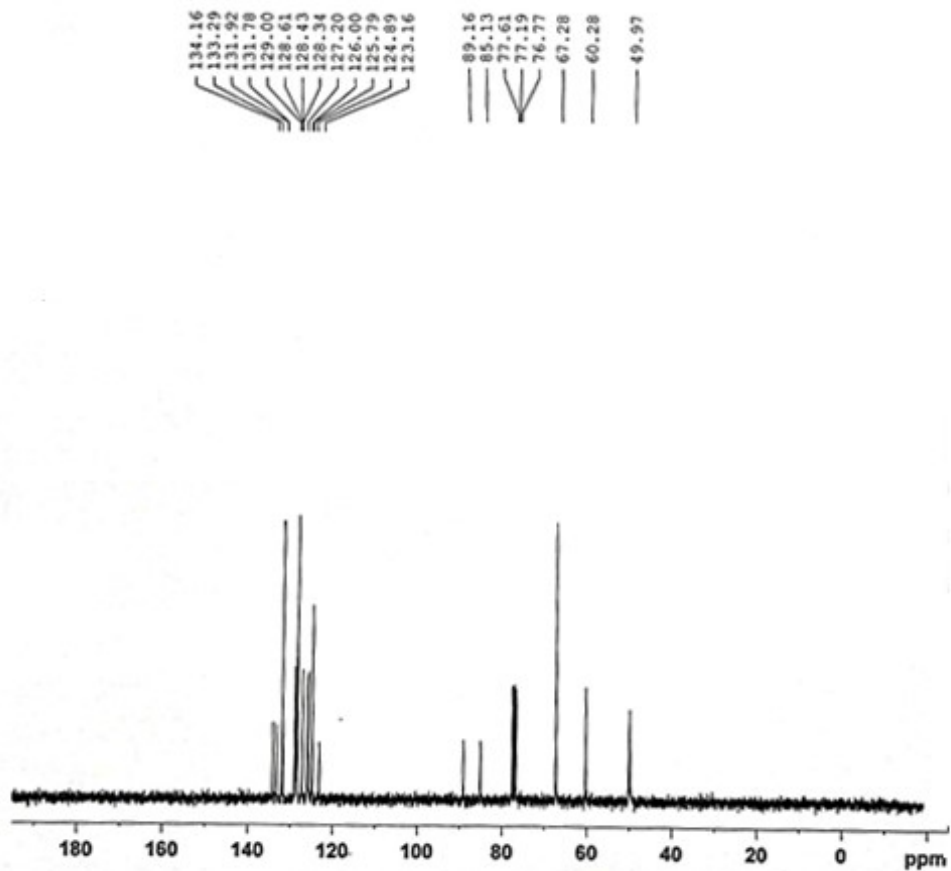

$^{13}\text{C}$  NMR

1-(1-(naphthalen-1-yl)-3-phenylprop-2-yn-1-yl) piperidine

8-(3-phenyl-1-(o-tolyl) prop-2-yn-1-yl) morpholine

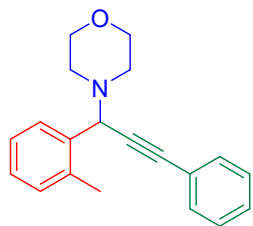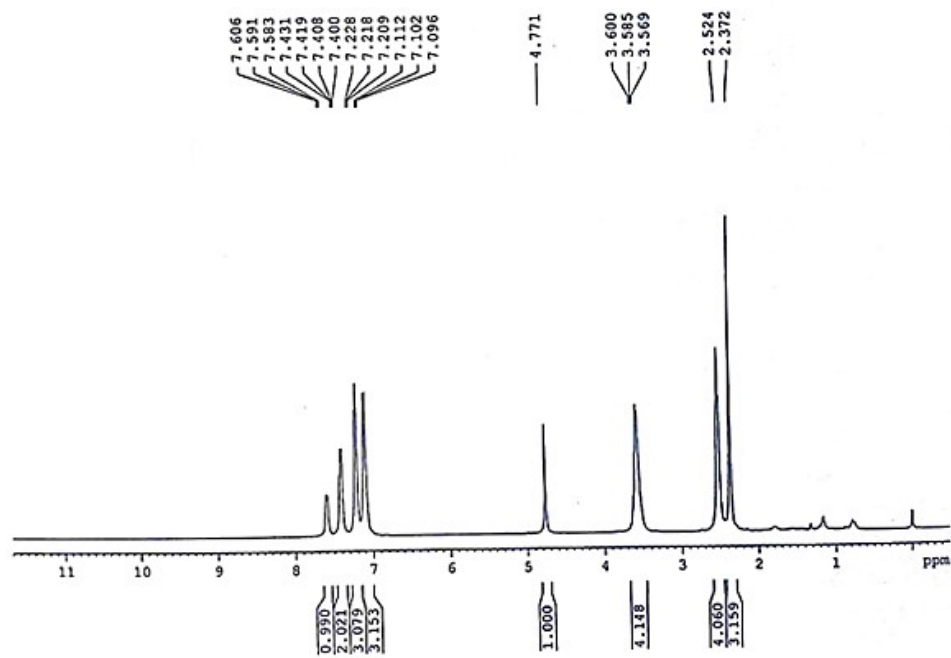

<sup>1</sup>H NMR

4-(3-phenyl-1-(o-tolyl) prop-2-yn-1-yl) morpholine



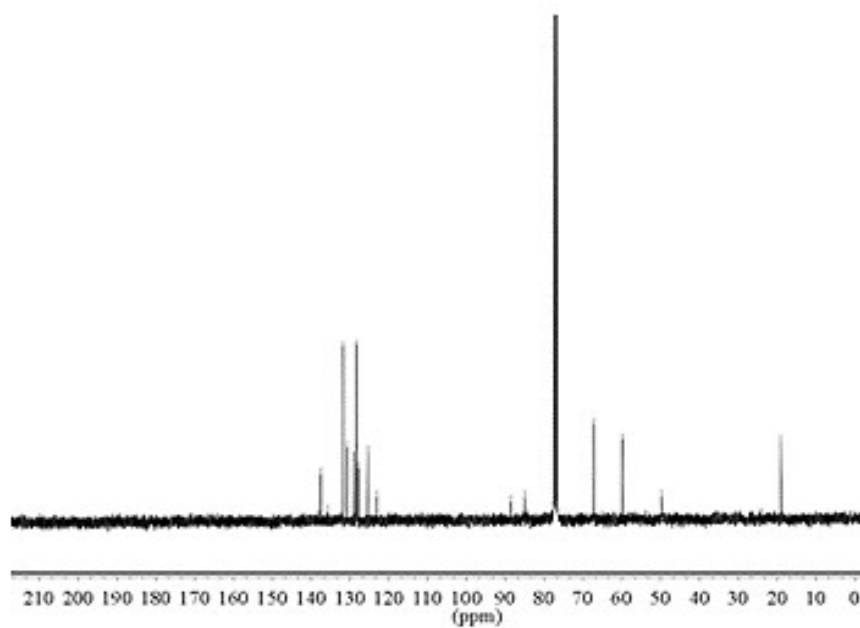

$^{13}\text{C}$  NMR

4-(3-phenyl-1-(o-tolyl) prop-2-yn-1-yl) morpholine

9-(3-phenyl-1-(p-tolyl) prop-2-yn-1-yl)morpholine

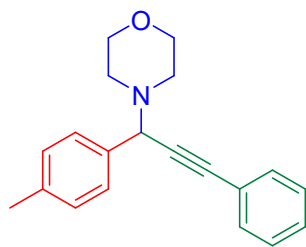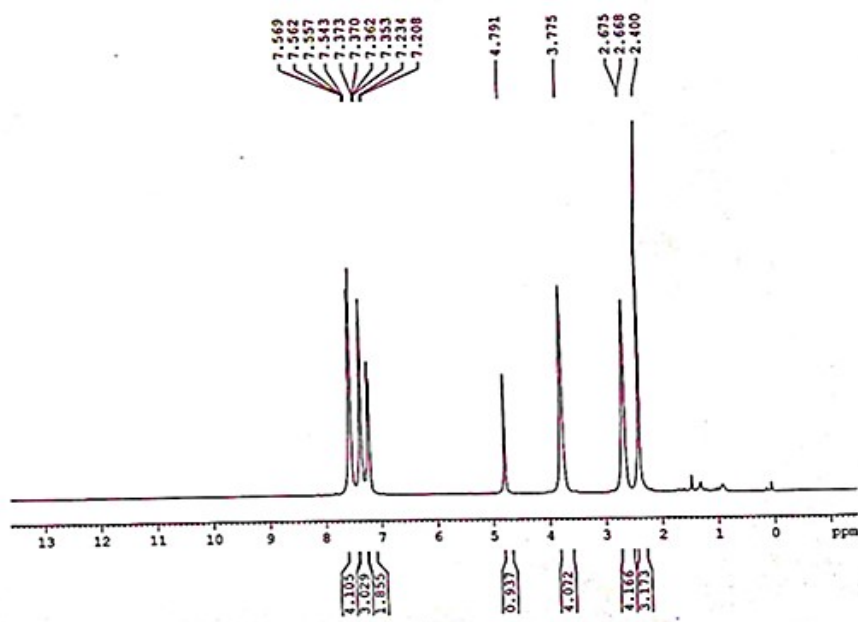

<sup>1</sup>H NMR

4-(3-phenyl-1-(p-tolyl) prop-2-yn-1-yl)morpholine

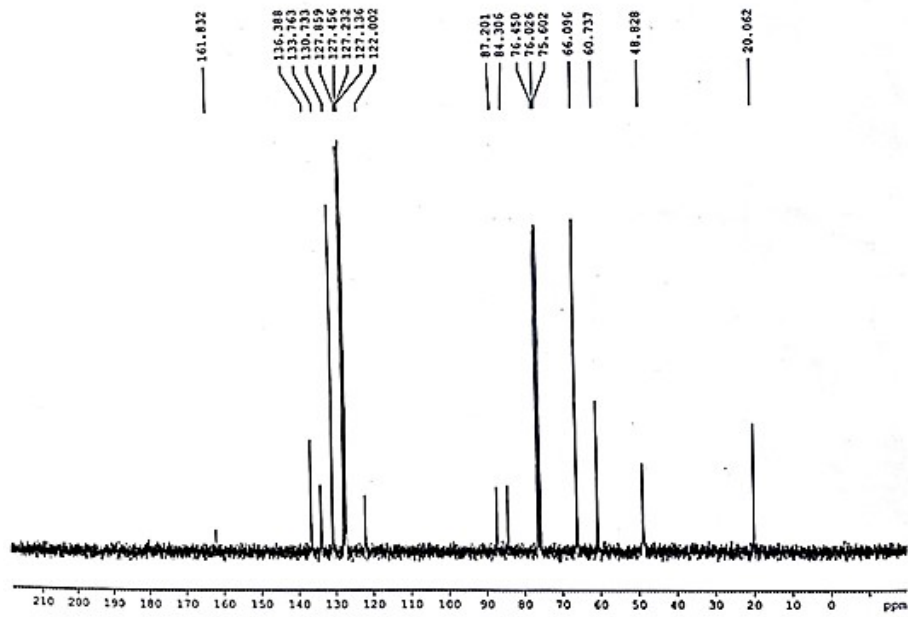

<sup>13</sup>C NMR

4-(3-phenyl-1-(p-tolyl) prop-2-yn-1-yl) morpholine

# 10-(3-phenyl-1-(o-tolyl) prop-2-yn-1-yl)piperidine

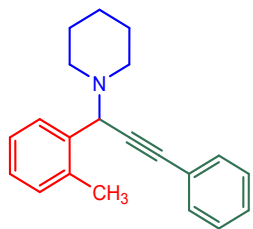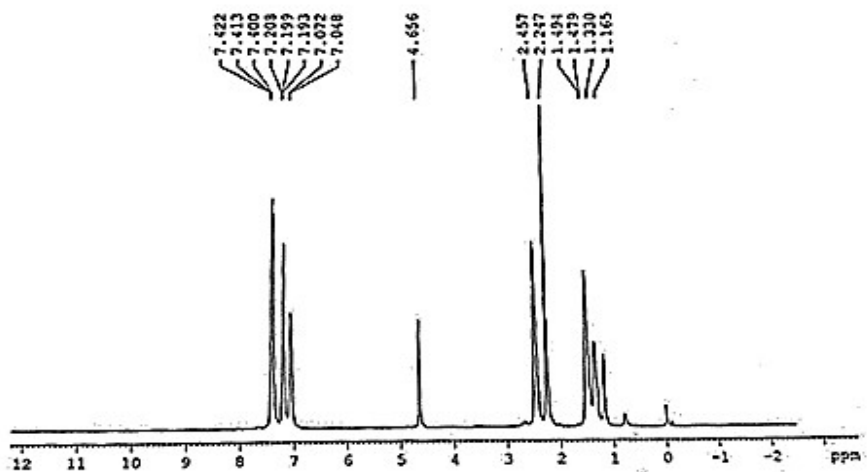

<sup>1</sup>H NMR

# 1-(3-phenyl-1-(o-tolyl) prop-2-yn-1-yl)piperidine

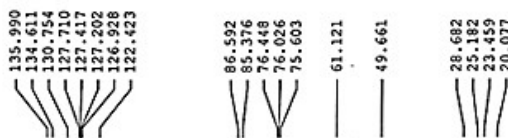

<sup>13</sup>C NMR

# 1-(3-phenyl-1-(o-tolyl) prop-2-yn-1-yl)piperidine

# 11-(1-(4-methoxyphenyl)-3-phenylprop-2-yn-1-yl) morpholine

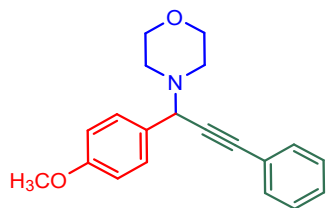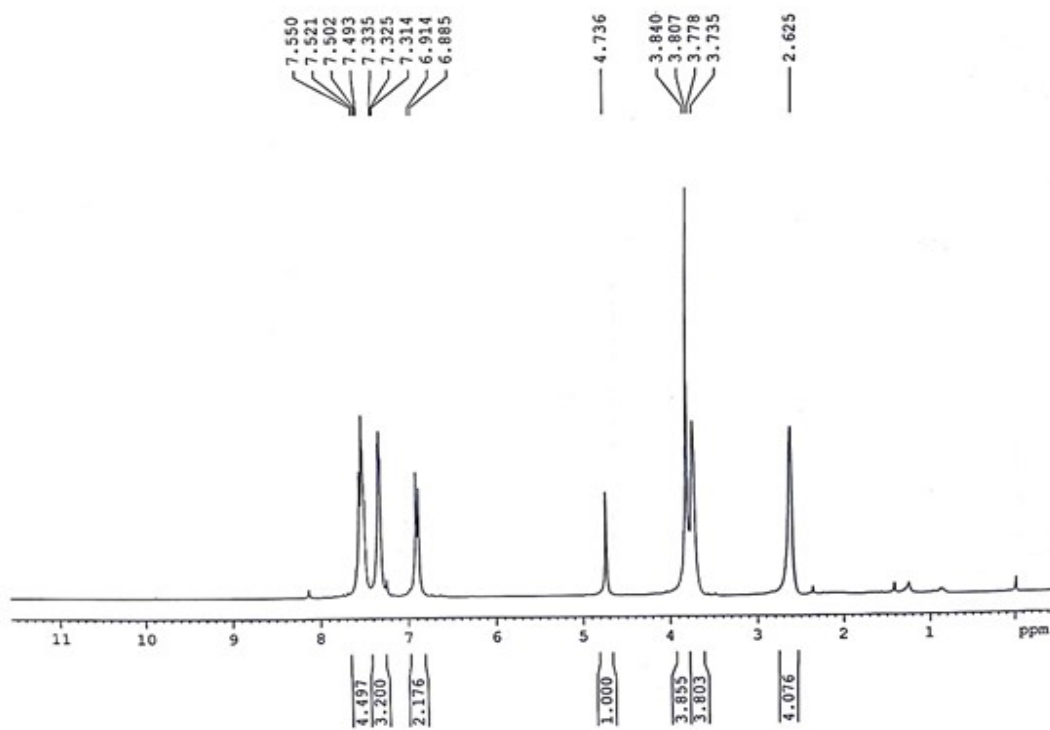

<sup>1</sup>H NMR

4-(1-(4-methoxyphenyl)-3-phenylprop-2-yn-1-yl) morpholine

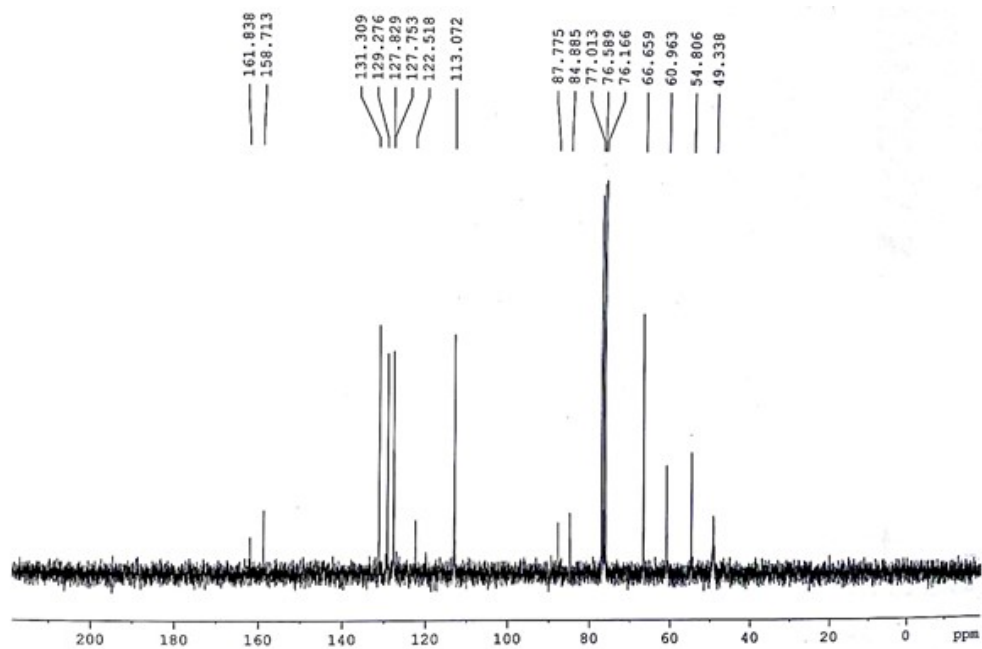

$^{13}\text{C}$  NMR

4-(1-(4-methoxyphenyl)-3-phenylprop-2-yn-1-yl) morpholine

# 12-(3-phenyl-1-(pyrrolidin-1-yl) prop-2-yn-1-yl)phenol

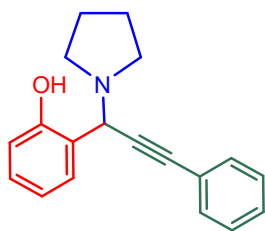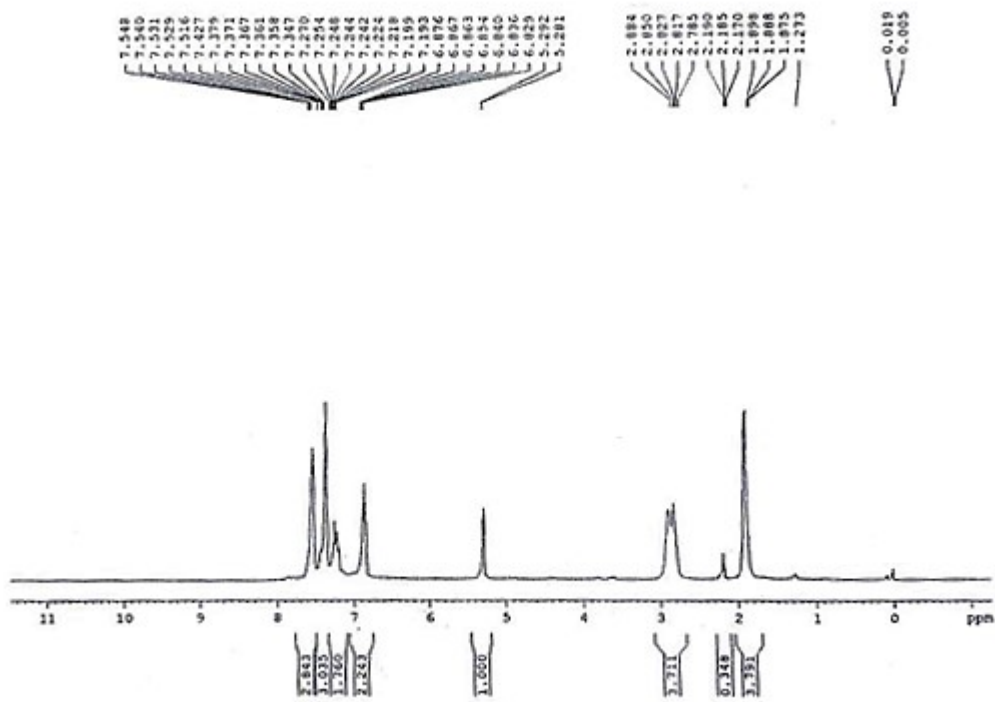

<sup>1</sup>H NMR

2-(3-phenyl-1-(pyrrolidin-1-yl) prop-2-yn-1-yl)phenol

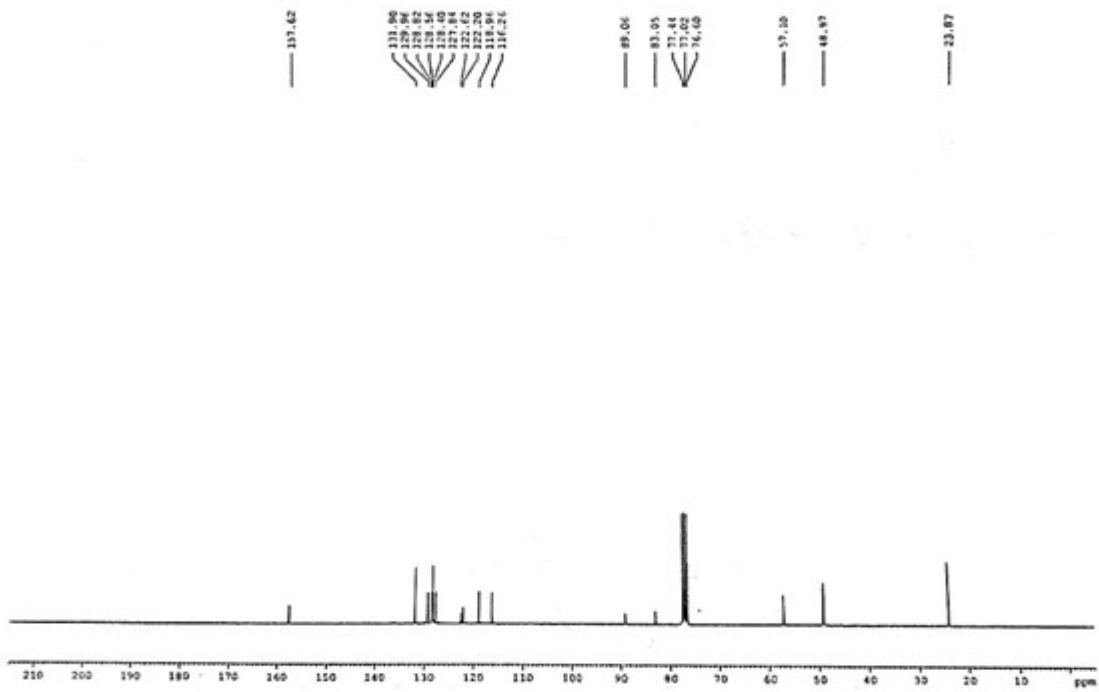

$^{13}\text{C}$  NMR

2-(3-phenyl-1-(pyrrolidin-1-yl) prop-2-yn-1-yl)phenol



13-(3-phenyl-1-(thiophen-2-yl) prop-2-yn-1-yl)morpholine

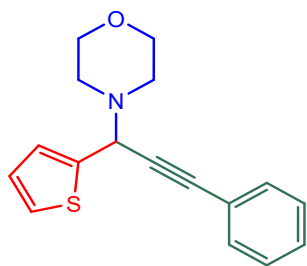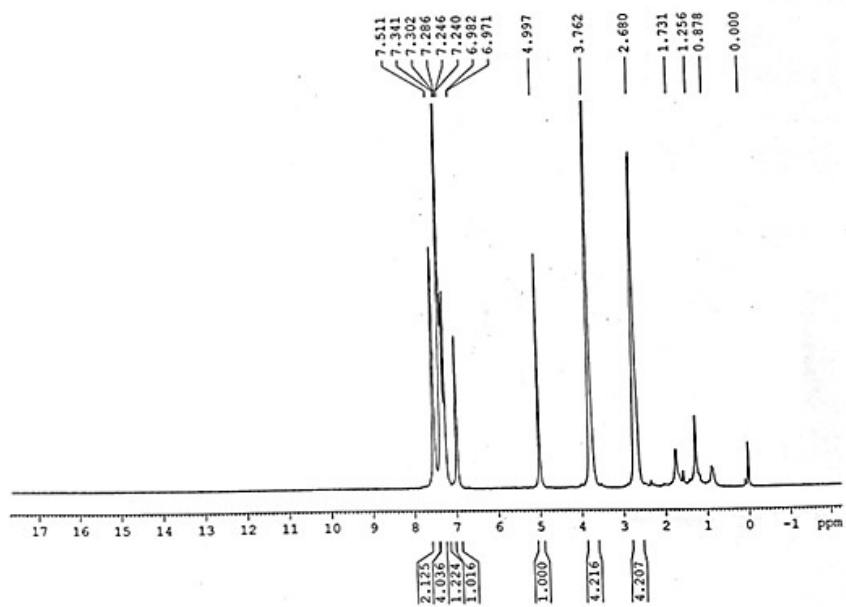

<sup>1</sup>H NMR

4-(3-phenyl-1-(thiophen-2-yl) prop-2-yn-1-yl)morpholine

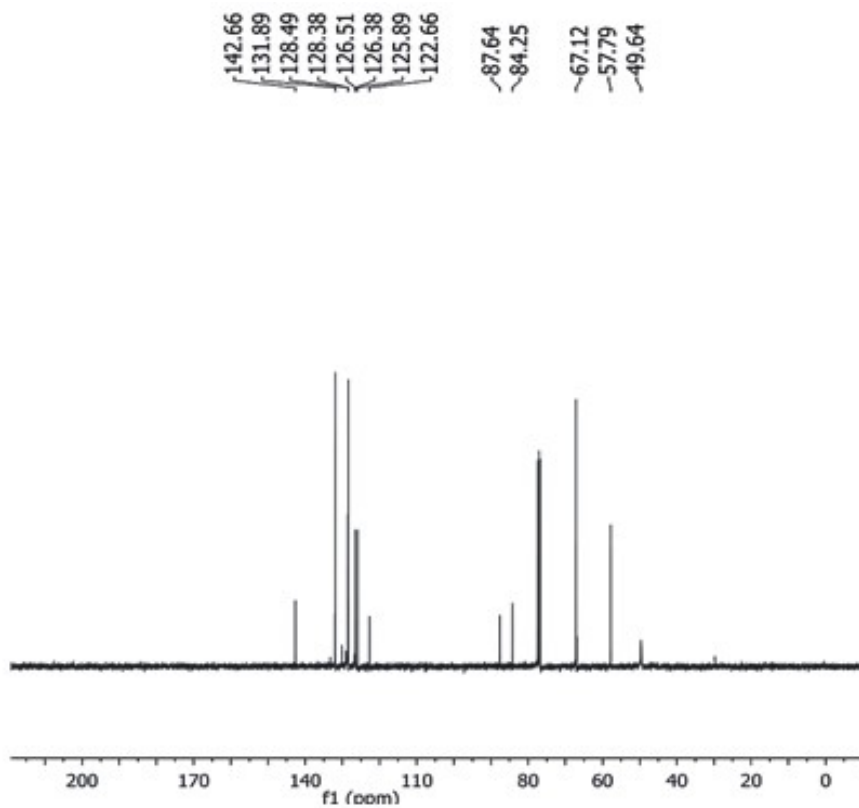

<sup>13</sup>C NMR

4-(3-phenyl-1-(thiophen-2-yl)prop-2-yn-1-yl)morpholine

# 14-(1-(2-chlorophenyl)-3-phenylprop-2-yn-1-yl) morpholine

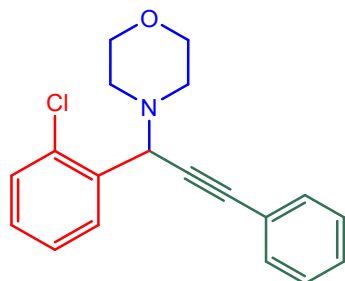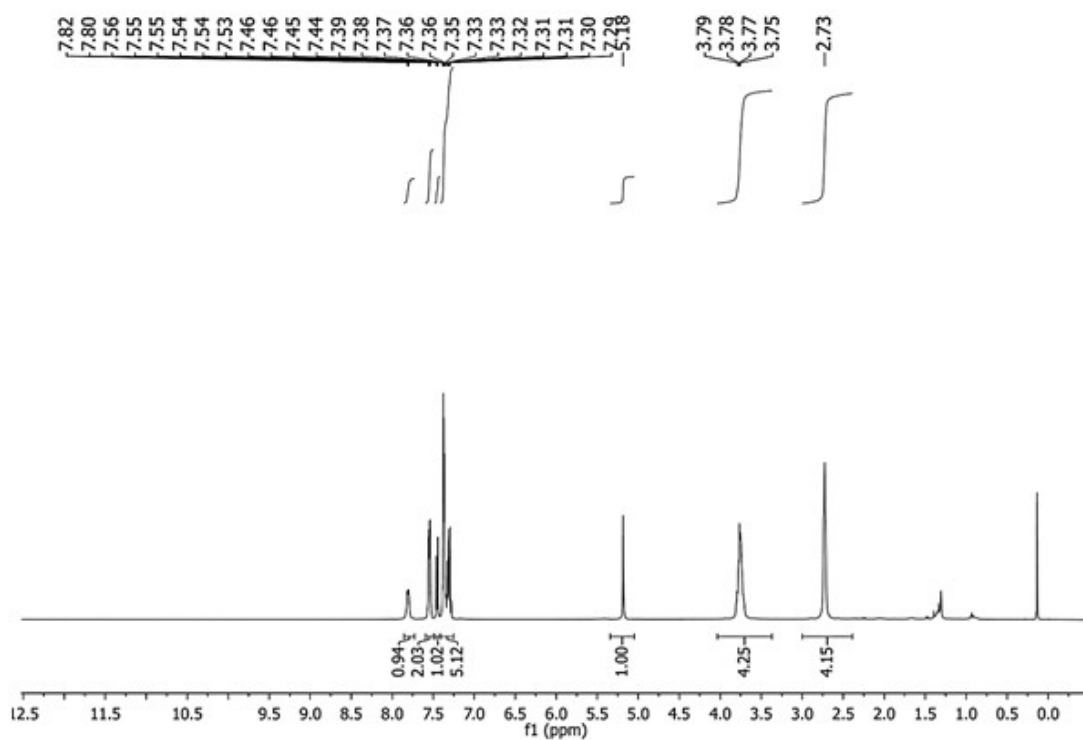

<sup>1</sup>H NMR

4-(1-(2-chlorophenyl)-3-phenylprop-2-yn-1-yl) morpholine

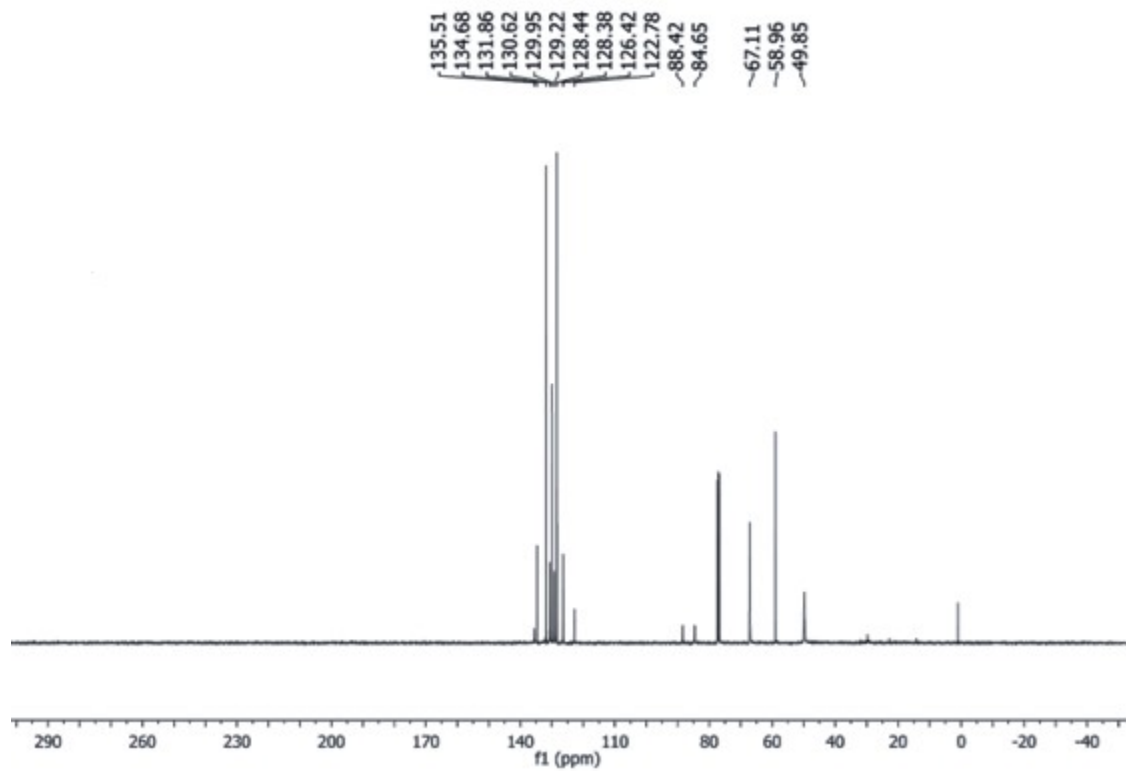

<sup>13</sup>C NMR

4-(1-(2-chlorophenyl)-3-phenylprop-2-yn-1-yl) morpholine

15-(3-phenyl-1-(thiophen-3-yl)prop-2-yn-1-yl)piperidine

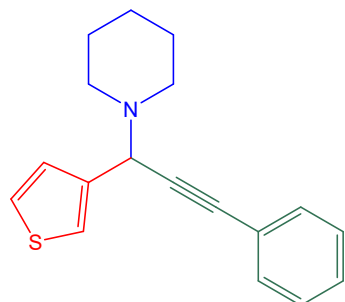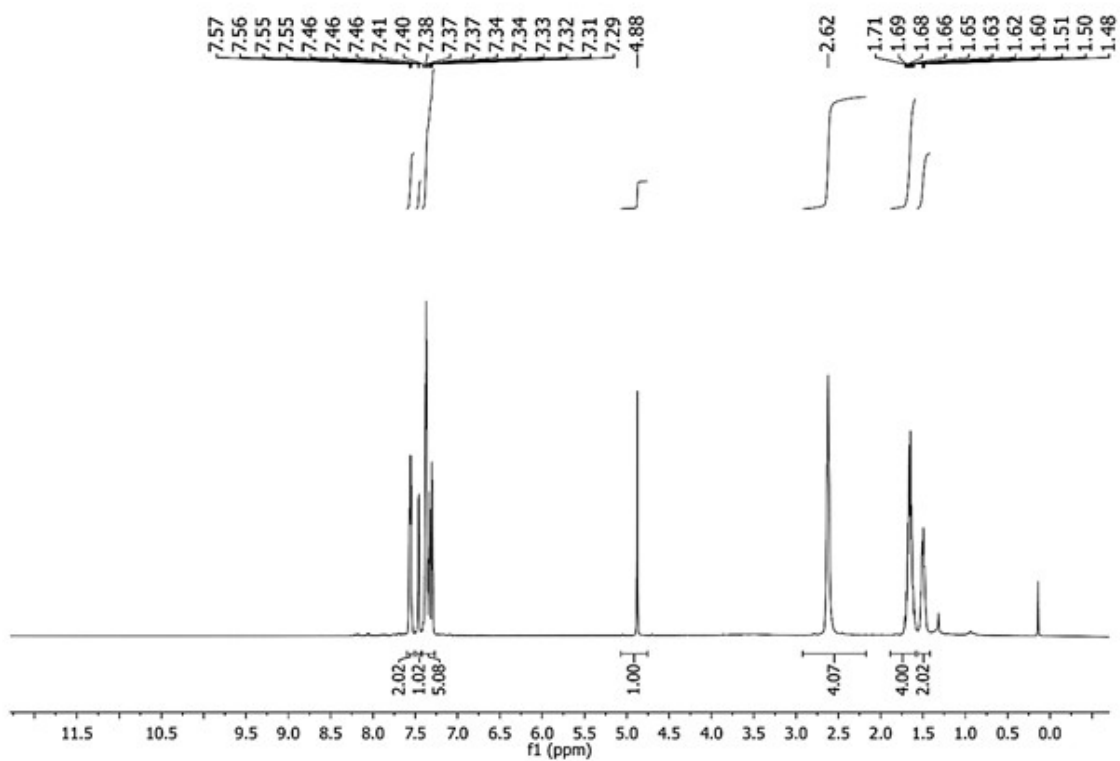

<sup>1</sup>H NMR

1-(3-phenyl-1-(thiophen-3-yl) prop-2-yn-1-yl)piperidine

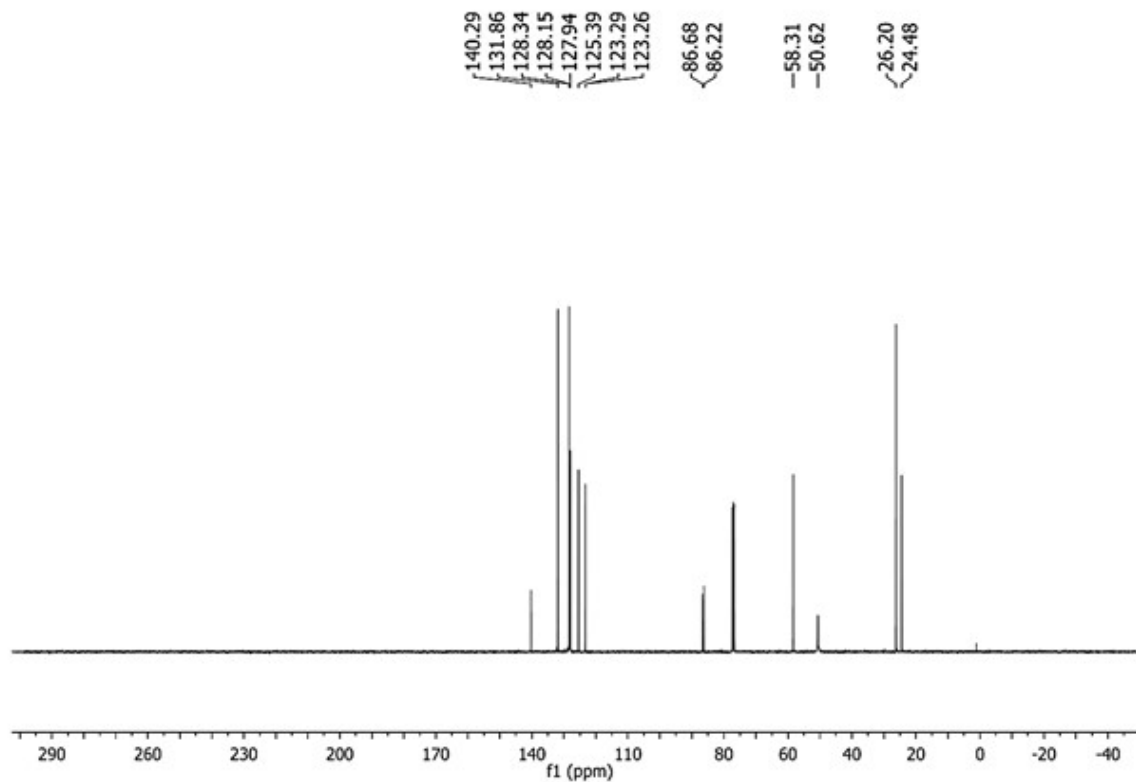

### <sup>13</sup>C NMR

1-(3-phenyl-1-(thiophen-3-yl) prop-2-yn-1-yl) piperidine

### References

- 1 N. V. Tzouras, S. P. Neofotistos, and G. C. Vougioukalakis, *ACS Omega.*, 2019, **4**, 10279 – 10292.
- 2 A. Neshat, M. Gholinejad, M. Afrasi, P. Mastroilli, S. Todisco, S. Gilanchi and F. Osanlou, *Appl. Organomet. Chem.*, 2021, **35**, e6180.
- 3 X. Zhian, X. Jinxi and L. Yiqun, *Appl. Organomet. Chem.*, 2021, **35**, e6349.
- 4 J.-Y. Zhang, X. Huang, Q.-Y. Shen, J.-Y. Wang and G.-H. Song, *Chin. Chem. Lett.*, 2018, **29**, 197-200.
- 5 M. Gholinejad, F. Saadati, S. Sheybanizadeh and B. Pullithadathil, *RSC Adv*, 2016, **6**, 4983-4991
